# Supplementary material for: Novel stalactiform structural CoNi-rGO for supercapacitors with enhanced electrochemical performance
Source: Royal Society of Chemistry journal article supplement (doi:10.1039/d3ce01240a), 2024-01-01
Supplement: d3ce01240a1.pdf [file d3ce01240a1.pdf]

Supporting Information for

## **A novel stalactiform structural CoNi-rGO for supercapacitors with enhanced electrochemical performance**

Yang Sun,<sup>‡b</sup> Zhaoyi Zhang,<sup>‡a</sup> Cong Xiang,<sup>a</sup> Yifan Jiang,<sup>a</sup> Yan Feng,<sup>a</sup> Xiaomei Cheng,<sup>a</sup> Xiangzi Li,<sup>\*a</sup> and Meifang Wang <sup>\*a</sup>

<sup>a</sup> *Department of Pharmacy, Wannan Medical College, Wuhu 241002, China*

<sup>b</sup> *School of Chemical and Environmental Engineering, Anhui Polytechnic University, Wuhu, 241000, China*

\* Corresponding authors.

*E-mail addresses: [li-xiang-zi@163.com](mailto:li-xiang-zi@163.com) (X. Z. Li), [zijingyuwinter@163.com](mailto:zijingyuwinter@163.com) (M. F. Wang).*

### **S1 Experiment Characterization**

The X-ray powder diffraction (XRD, MiniFlex600) was conducted on a D/teX Ultra2 diffractometer. Field emission scanning electron microscopy (FESEM) images were obtained on a Hitachi S-4800 field emission scanning electron microscope with an operating voltage of 5 kV. Transmission electron microscopy (TEM) and HAADF-STEM-EDX mapping images were obtained on a Hitachi HT7700 transmission electron microscope, employing an accelerating voltage of 120 kV. X-ray photoelectron spectroscopy (XPS) of the product was carried out using a Thermo ESCALAB 250 instrument, employing monochromic Al K $\alpha$  ( $h\nu = 1486.6$  eV) at a power of 150 W. Nitrogen adsorption-desorption isotherms were measured at the liquid nitrogen temperature (77 K), using a Micromeritics ASAP 2460 analyzer. Surface areas were calculated by the Brunauer-Emmett-Teller (BET) method. Operando Raman measurements were recorded

using a Raman spectrometer (RENISHAW in Via system, U.K.) with a 532 nm He/Ne laser as the excitation source.

## S2 Electrochemical Measurements

The electrochemical performance measurements were carried out by CHI 660E electrochemical workstation (Chenhua Instruments, China). In a three-electrode system, the samples were adopted directly as the working electrodes ( $1 \times 1 \text{ cm}^2$ ), Hg/HgO and Pt wires as reference and counter electrodes, respectively. Cyclic voltammetry (CV, 0 - 0.7 V), electrochemical impedance spectroscopy (EIS, at open circuit potential with an amplitude of 5 mV,  $10^5$  - 0.01 Hz) and galvanostatic charge/discharge (GCD, 0 - 0.5 V) measurements were examined in 2 M KOH aqueous electrolytes. At different current densities, the specific gravimetric capacitance ( $C_s$ , or  $\text{F g}^{-1}$ ) of the hybrid battery was calculated by equation (S1): [1]

$$C_s = \frac{i * \Delta T}{m * \Delta V} \quad (\text{S1})$$

where  $m$  (g) is the mass of the active material,  $i$  (A) is the constant discharging current,  $\Delta T$  (s) is the duration of the discharge process and  $\Delta V$  (V) is the voltage window.

An asymmetric supercapacitor (ASC) was prepared using S-CoNi-rGO as the positive electrode, the activated carbon (AC) as the negative electrode, and glass fiber paper as the separator. The electrochemical test was carried out in 2 M KOH electrolyte. The AC electrode was made by mixing active materials, acetylene black and polyvinylidene fluoride with a mass ratio of 7:2:1 on a nickel foam and then drying at 60 °C for 24 h.

The charge balance of the supercapacitor follows  $q^+ = q^-$ , where  $q^+$  and  $q^-$  represent the charges stored by the positive and negative electrodes respectively. The optimized mass ratio

between the positive and negative electrode materials for S-CoNi-rGO//AC can be calculated based on the charge balance relationship ( $q^+ = q^-$ ) in the following equation: [2,3]

$$\frac{m^+}{m^-} = \frac{C^- \Delta V^-}{C^+ \Delta V^+} \quad (S2)$$

where  $C^{+/-}$  ( $F\ g^{-1}$ ) are the specific capacitances of positive and negative electrodes,  $\Delta V^{+/-}$  (V) are the potential windows of positive and negative electrodes, and  $m^{+/-}$  (g) stands for the loading masses of materials on the positive and negative electrodes.

The energy density ( $E$ ,  $Wh\ kg^{-1}$ ) and power density ( $P$ ,  $kW\ kg^{-1}$ ) were obtained from GCD curves according to the following formula: [4]

$$E = \frac{C_s \Delta V^2}{7.2} \quad (S3)$$

$$P = \frac{3600E}{\Delta t} \quad (S4)$$

where  $C_s$  ( $F\ g^{-1}$ ) represents the specific capacitance,  $\Delta V$  (V) stands for the potential window,  $\Delta t$  (s) stands for the time of discharging, respectively.

### S3 Supplementary Tables and Figures

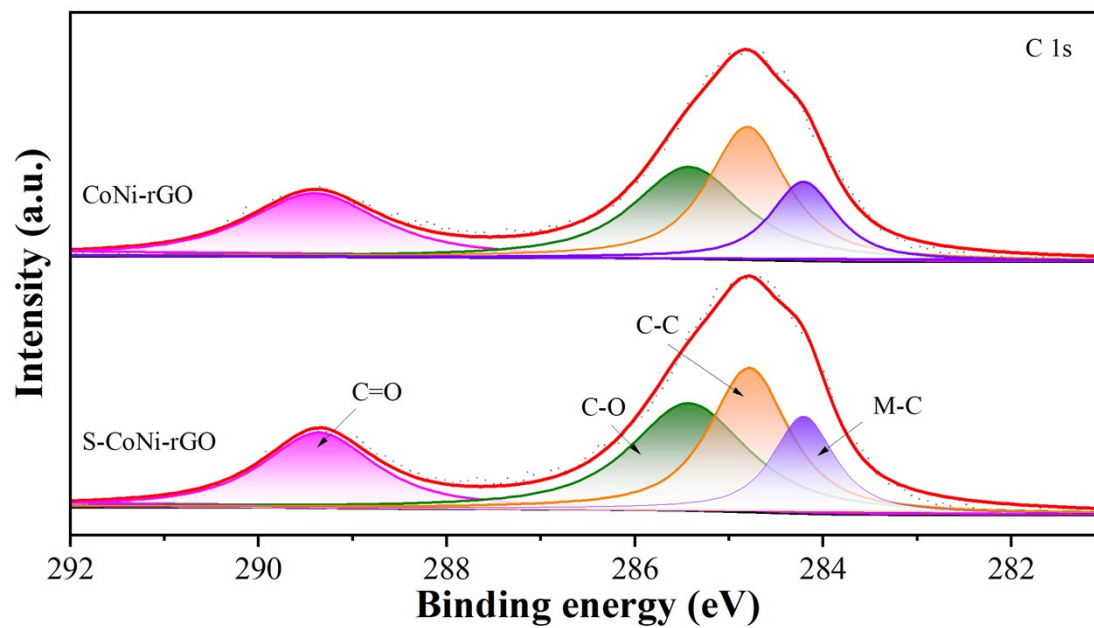

Fig. S1. XPS spectra of CoNi-rGO, S-CoNi-rGO for C 1s.

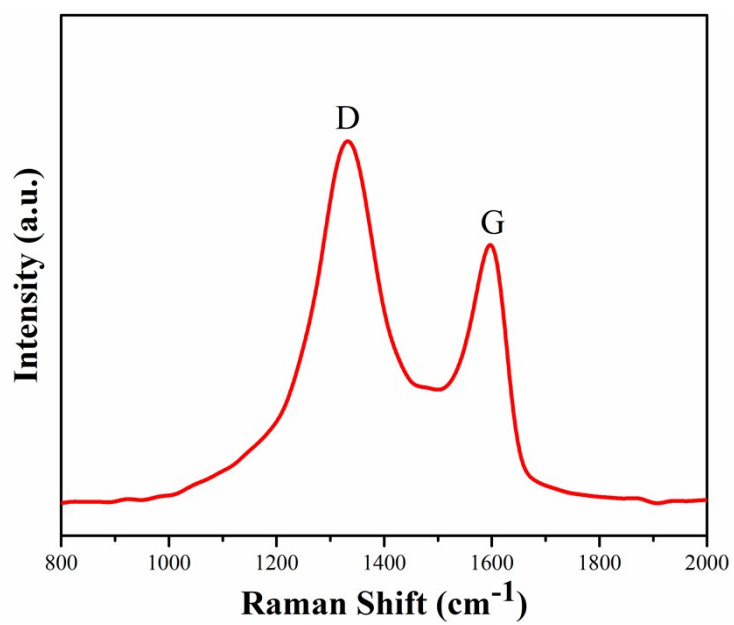

Fig. S2. Raman spectra of S-CoNi-rGO.

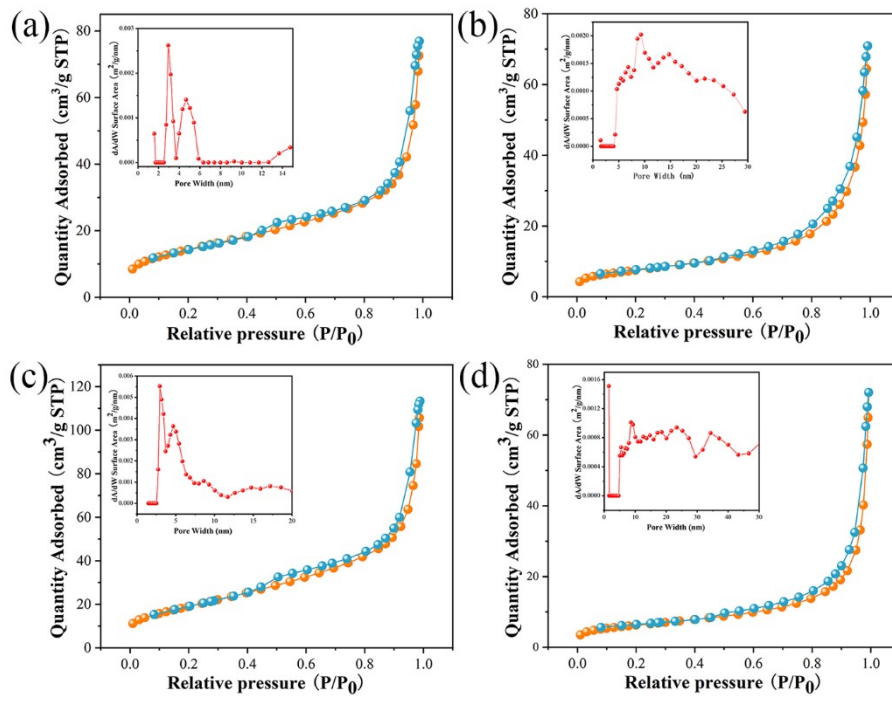

Fig. S3.  $N_2$  adsorption/desorption isotherms and pore-size (inset) distributions of (a) CoNi-1, (b) CoNi-F, (c) CoNi-rGO, (d) S-CoNi-rGO, respectively.

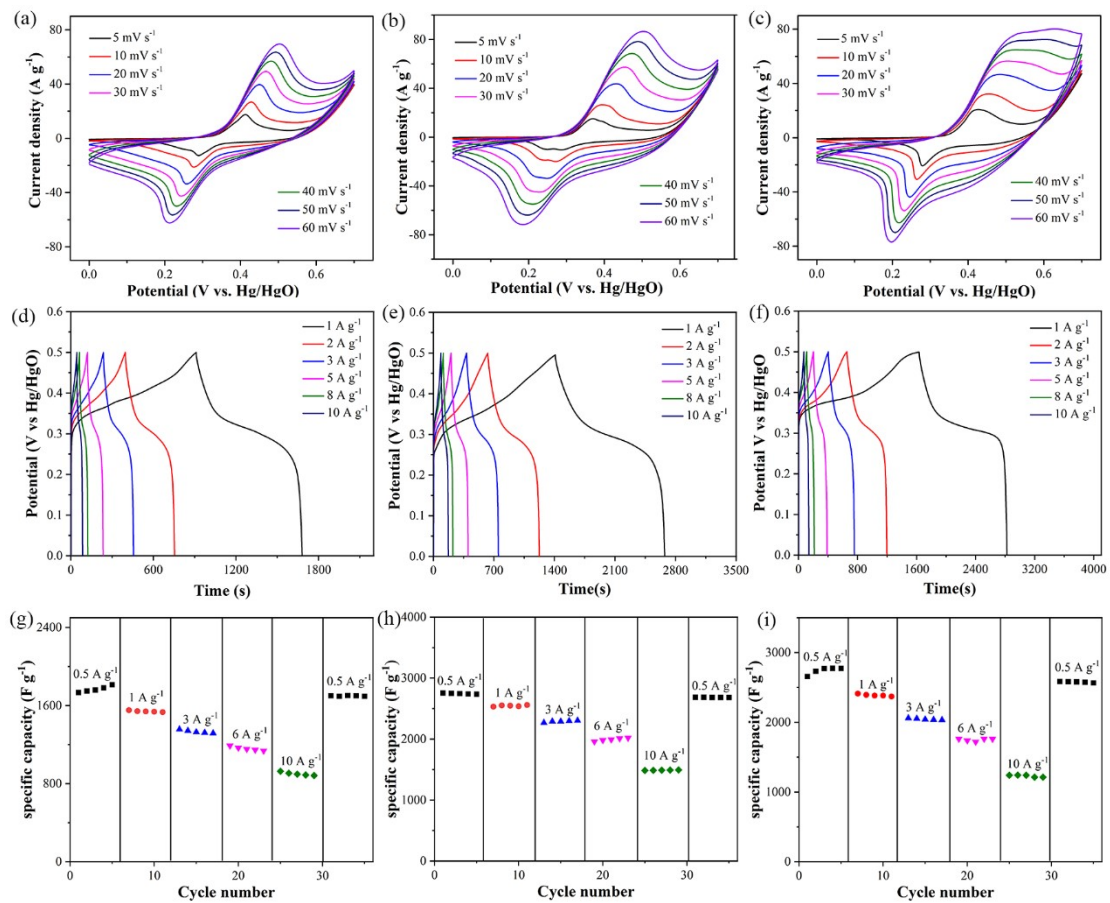

Fig. S4. (a-c) CV curves at different scan rates, (d-f) GCD curves at different current densities, (g-i) the cycling performance at various current densities of CoNi-1, CoNi-F, CoNi-rGO.

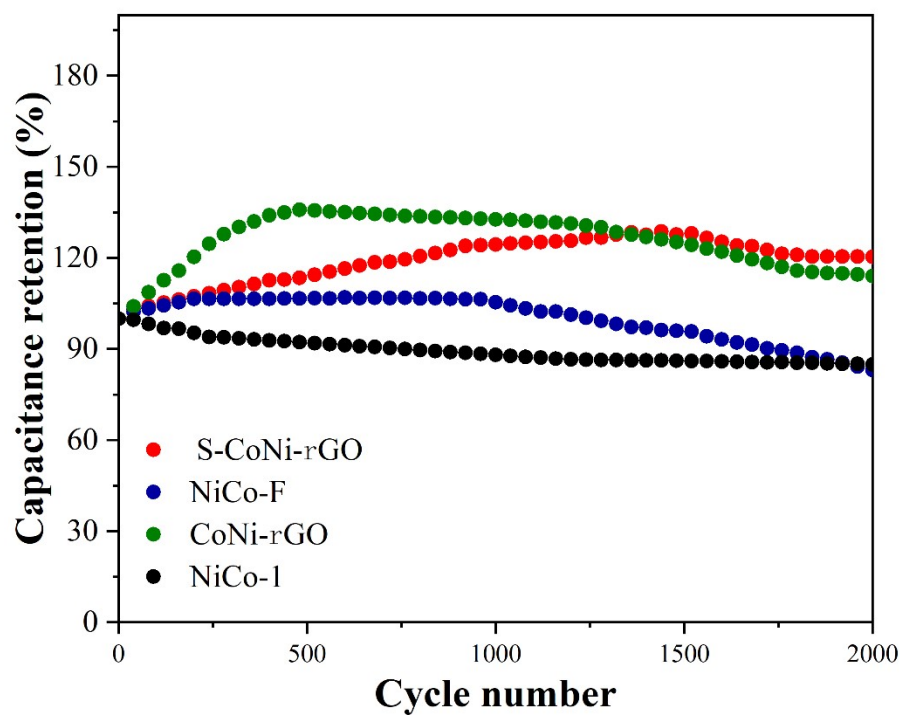

Fig. S5. The cycling stability for CoNi-l, CoNi-F, CoNi-rGO and S-CoNi-rGO at current density of 10 A g<sup>-1</sup>.

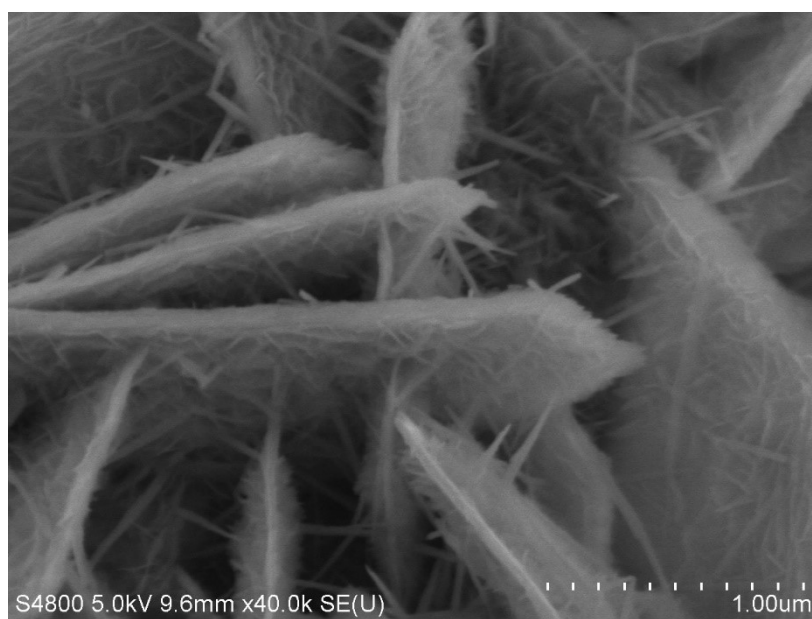

Fig. S6. The SEM images of S-CoNi-rGO after 10000 recycles tests.

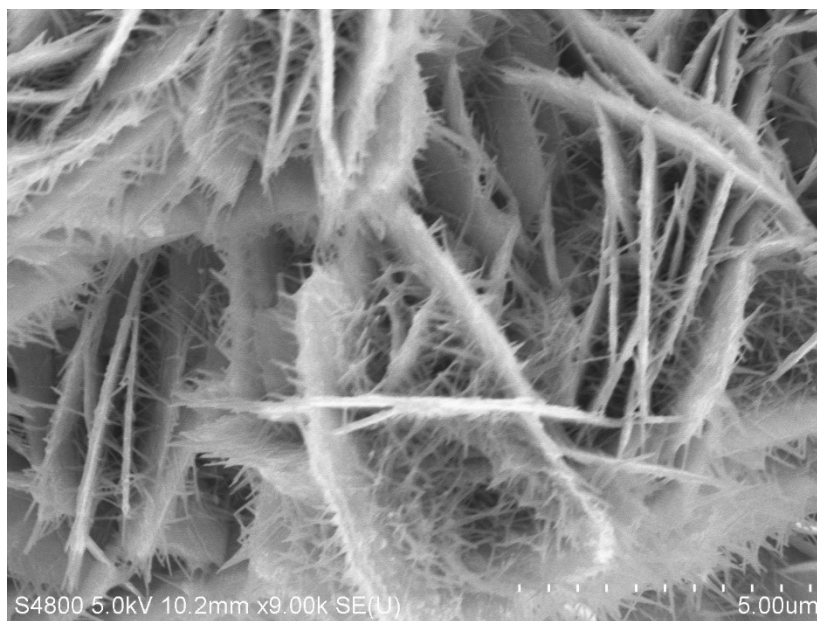

Fig. S7. The SEM images of S-CoNi-rGO // AC ASC device after 5000 recycles tests.

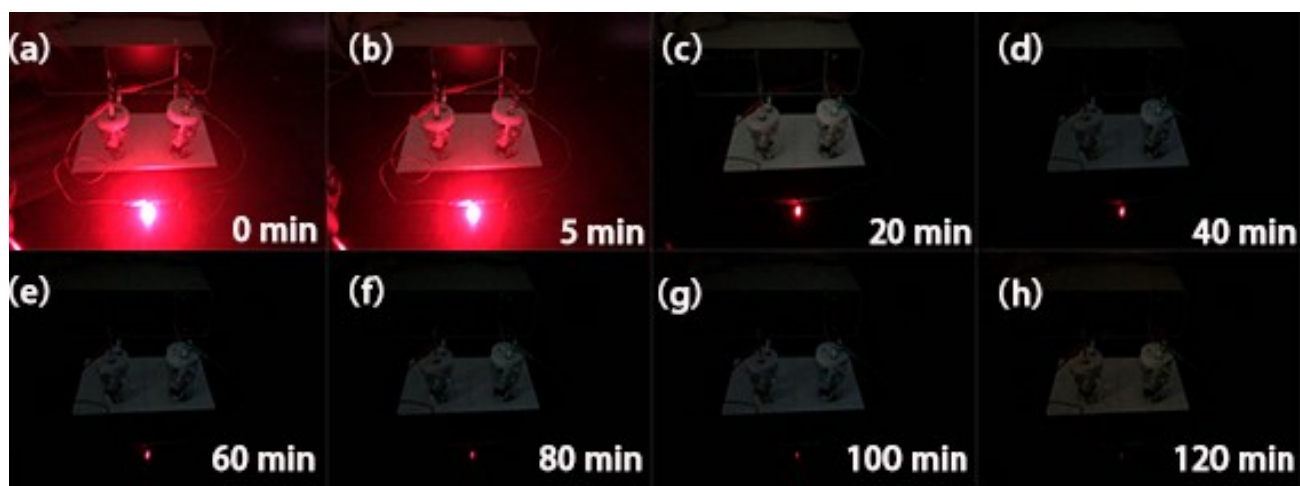

Fig. S8. (a-h) LED-driven tests during 120 min.

**Table S1.** The specific surface area and pore volume of of CoNi-1, CoNi-F, CoNi-rGO, S-CoNi-rGO.

| Materials                                            | CoNi-1 | CoNi-F | CoNi-rGO | S-CoNi-rGO |
|------------------------------------------------------|--------|--------|----------|------------|
| Specific surface area ( $\text{m}^2 \text{g}^{-1}$ ) | 51.94  | 26.88  | 69.59    | 32.52      |
| Pore volume ( $\text{cm}^3 \text{g}^{-1}$ )          | 0.119  | 0.110  | 0.175    | 0.132      |

**Table S2.** Comparison of S-CoNi-rGO//AC device electrochemical performances with those reported literatures.

| Hybrid battery                                                | Electrolyte | Energy density<br>$\text{W h kg}^{-1}$ | Power density<br>$\text{kW kg}^{-1}$ | Ref.      |
|---------------------------------------------------------------|-------------|----------------------------------------|--------------------------------------|-----------|
| $\text{Co}_3\text{O}_4@\text{Ni}(\text{OH})_2 // \text{AC}$   | PVA:KOH     | 40.0                                   | 3.45                                 | [5]       |
| NiCo-MOF//AC                                                  | PVA:KOH     | 45.3                                   | 0.85                                 | [4]       |
| $\text{NiCo}_2\text{O}_4@\text{Ni}(\text{OH})_2 // \text{AC}$ | 2M KOH      | 98.5                                   | 0.85                                 | [6]       |
| CuCo HNSs/NF//AC                                              | 1M KOH      | 144.4                                  | 40                                   | [7]       |
| $\text{CF}@\text{CuO}@\text{CoNi LDH} // \text{RGO}$          | 2M KOH      | 92.5                                   | 0.4                                  | [8]       |
| $\text{Ni}(\text{OH})_2/\text{CNT} // \text{AC}$              | 3M KOH      | 32.5                                   | 1.8                                  | [9]       |
| $\text{NiCo}_2\text{S}_4@\text{Ni}(\text{OH})_2 // \text{AC}$ | 2M KOH      | 53.3                                   | 0.29                                 | [10]      |
| $\text{Co}(\text{OH})_2/\text{fCNT} // \text{fCNT}$           | PVA:KOH     | 17                                     | 7                                    | [11]      |
| NMCOH-2.4//NDG                                                | 3 M KOH     | 92                                     | 1.7                                  | [12]      |
| S-CoNi-rGO //AC                                               | 2 M KOH     | 114.03                                 | 0.85                                 | This work |

**Table S3.** S-CoNi-rGO//AC device electrochemical performances at different current densities.

| Hybrid battery | The current density<br>$\text{A g}^{-1}$ | The capacitance<br>$\text{F g}^{-1}$ | Energy density<br>$\text{Wh kg}^{-1}$ | Power density<br>$\text{kW kg}^{-1}$ |
|----------------|------------------------------------------|--------------------------------------|---------------------------------------|--------------------------------------|
| S-CoNi-rGO//AC | 1                                        | 284.1                                | 114.03                                | 0.854                                |
| S-CoNi-rGO//AC | 2                                        | 276.9                                | 111.14                                | 1.724                                |
| S-CoNi-rGO//AC | 3                                        | 267.9                                | 107.53                                | 2.579                                |
| S-CoNi-rGO//AC | 4                                        | 259.2                                | 104.04                                | 3.419                                |

|                |    |       |        |       |
|----------------|----|-------|--------|-------|
| S-CoNi-rGO//AC | 5  | 253.5 | 101.75 | 4.249 |
| S-CoNi-rGO//AC | 8  | 246.0 | 96.57  | 6.803 |
| S-CoNi-rGO//AC | 10 | 234.7 | 94.21  | 8.501 |

---

## Supplementary References

- [1] A. Gowrisankar, T. Selvaraju, *Langmuir*, 2021, **37**, 5964-5978.
- [2] D. Merum, R. R. Nallapureddy, M. R. Pallavolu, T. K. Mandal, R. R. Gutturu, N. Parvin, A. N. Banerjee and S. W. Joo, *ACS Appl. Energy Mater.*, 2022, **5**, 5561-5578.
- [3] J. J. Xia, L. M. Zhang, S. G. Xuan, Y. H. Ni, L. Zhang, *CrystEngComm*, 2022, **24**, 2159-2170.
- [4] H. Li, X. F. Wang, L. L. Dai, F. J. Guo, H. Y. Mi, C. C. Ji and L.Y. Sun, *Inorg. Chem.*, 2022, **61**, 3866-3874.
- [5] X. Bai, Q. Liu, J. Liu, H. Zhang, Z. Li, X. Jing, P. Liu, J. Wang and R. Li, *Chem. Eng. J.*, 2017, **31**, 35-45.
- [6] P. Xia, Q. Y. Wang, Y. T. Wang, W. Quan, D. L. Jiang and M. Chen, *J. Alloy. Compd.*, 2019, **771**, 784-792.
- [7] N. Jayababu, D. Kim, *Small*, 2021, **17**, 2102369.
- [8] F. Chen, C. Chen, Q. Hu, B. Xiang, T. T. Song, X. F. Zou, W. N. Li, B. X. Xiong and M. S. Deng, *Chem. Eng. J.*, 2020, **401**, 126145.
- [9] B. Guan, Y. Li, B. Yin, K. Liu, D. Wang, H. Zhang and C. Cheng, *Chem. Eng. J.*, 2017, **308**, 1165-1173.
- [10] Y. Yang, D. Cheng, S. Chen, Y. Guan and J. Xiong, *Electrochim. Acta*, 2016, **193**, 116-127.
- [11] R. Ranjithkumar, S. E. Arasi, P. Devendran, N. Nallamuthu, A. Arivarasan, P. Lakshmanan, S. Sudhahar and M. K. Kumar, *Diam. Relat. Mater.*, 2020, **110**, 108120.
- [12] F. N. I. Sari, K. C. Lin and J. M. Ting, *Appl. Surf. Sci.*, 2022, **576**, 151805.
